# Supplementary material for: Clinical and genomic safety of treatment with Ginkgo biloba L. leaf extract (IDN 5933/Ginkgoselect®Plus) in elderly: a randomised placebo-controlled clinical trial [GiBiEx]
Source: Springer Nature journal article supplement (doi:10.1186/s12906-018-2080-5), 2018-01-22
Supplement: MOESM3 [file 15406498]

**Additional file 3 Comet Assay Raw Data.**

**Individual data relative to comet assay. For each donor data are shown before (T0) and after (T1) placebo or IDN 5933 administration.**

| <b>Code number</b> | <i>Treatment group:<br/>Placebo (0)<br/>IDN 5933 (1)</i> | <i>Blood sampling</i> | Tail-<br>Length | % TI  | Tail<br>Moment | %<br>hedgehogs | <i>Blood sampling</i> | Tail-<br>Length | % TI  | Tail<br>Moment | %<br>hedgehogs |
|--------------------|----------------------------------------------------------|-----------------------|-----------------|-------|----------------|----------------|-----------------------|-----------------|-------|----------------|----------------|
| 5RT                | 0                                                        | T0                    | 5.72            | 3.99  | 2.74           | 5.13           | T1                    | 19.02           | 16.79 | 10.58          | 4.91           |
| 30ST               | 0                                                        | T0                    | 12.93           | 9.05  | 6.36           | 8.92           | T1                    | 3.20            | 2.58  | 1.72           | 0.00           |
| 32ST               | 0                                                        | T0                    | 9.32            | 7.86  | 5.32           | 3.77           | T1                    | 2.85            | 1.80  | 1.07           | 0.59           |
| 33ST               | 0                                                        | T0                    | 7.48            | 5.72  | 3.78           | 3.90           | T1                    | 2.54            | 1.40  | 0.80           | 0.00           |
| 35ST               | 0                                                        | T0                    | 12.48           | 10.54 | 6.29           | 0.63           | T1                    | 7.64            | 7.19  | 4.28           | 1.25           |
| 38ST               | 0                                                        | T0                    | 8.14            | 6.60  | 4.14           | 2.45           | T1                    | 4.23            | 2.92  | 2.01           | 0.00           |
| 39ST               | 0                                                        | T0                    | 6.09            | 5.90  | 3.89           | 1.92           | T1                    | 2.59            | 1.76  | 0.84           | 2.61           |
| 44ST               | 0                                                        | T0                    | 6.17            | 4.77  | 3.23           | 2.53           | T1                    | 10.94           | 7.52  | 5.78           | 0.00           |
| 53MT               | 0                                                        | T0                    | 6.68            | 5.48  | 3.19           | 1.85           | T1                    | 16.19           | 12.07 | 7.30           | 6.54           |
| 55MT               | 0                                                        | T0                    | 13.55           | 9.79  | 7.32           | 5.77           | T1                    | 13.36           | 10.42 | 6.49           | 6.71           |
| 59MT               | 0                                                        | T0                    | 20.94           | 14.09 | 9.22           | 2.56           | T1                    | 17.08           | 13.56 | 9.14           | 3.73           |
| 63MT               | 0                                                        | T0                    | 9.53            | 5.67  | 3.35           | 1.85           | T1                    | 9.37            | 6.49  | 4.01           | 0.64           |
| 65MT               | 0                                                        | T0                    | 10.42           | 5.66  | 3.43           | 4.46           | T1                    | 14.02           | 10.75 | 6.63           | 8.39           |
| 67MT               | 0                                                        | T0                    | 14.49           | 14.43 | 8.94           | 4.58           | T1                    | 13.22           | 11.60 | 6.67           | 0.63           |
| 70MT               | 0                                                        | T0                    | 6.80            | 4.93  | 3.11           | 0.00           | T1                    | 3.75            | 2.06  | 1.21           | 3.16           |
| 72MT               | 0                                                        | T0                    | 11.54           | 8.39  | 6.00           | 5.84           | T1                    | 6.31            | 3.89  | 2.41           | 3.95           |
| 74MT               | 0                                                        | T0                    | 19.58           | 17.69 | 11.11          | 4.97           | T1                    | 8.45            | 6.27  | 3.61           | 2.55           |
| 75MT               | 0                                                        | T0                    | 19.63           | 11.89 | 8.20           | 5.16           | T1                    | 16.34           | 9.08  | 5.43           | 6.41           |
| 77MT               | 0                                                        | T0                    | 13.08           | 9.55  | 6.39           | 2.42           | T1                    | 11.79           | 8.01  | 5.35           | 5.88           |
| 78MT               | 0                                                        | T0                    | 7.38            | 4.10  | 2.09           | 2.50           | T1                    | 9.72            | 7.04  | 4.42           | 3.90           |
| 1RT                | 1                                                        | T0                    | 6.02            | 5.03  | 2.76           | 3.21           | T1                    | 9.27            | 6.99  | 4.05           | 4.35           |
| 10RT               | 1                                                        | T0                    | 12.05           | 10.10 | 6.73           | 9.15           | T1                    | 17.48           | 15.73 | 9.81           | 4.38           |
| 11RT               | 1                                                        | T0                    | 5.71            | 4.34  | 2.68           | 3.75           | T1                    | 6.41            | 4.83  | 2.59           | 3.77           |
| 13RT               | 1                                                        | T0                    | 15.02           | 11.54 | 6.90           | 4.52           | T1                    | 15.25           | 12.06 | 8.06           | 14.19          |
| 14RT               | 1                                                        | T0                    | 4.44            | 3.62  | 2.09           | 4.40           | T1                    | 15.97           | 13.01 | 7.88           | 8.39           |
| 25ST               | 1                                                        | T0                    | 4.98            | 3.98  | 2.05           | 3.59           | T1                    | 1.22            | 0.63  | 0.26           | 1.20           |
| 28ST               | 1                                                        | T0                    | 3.32            | 2.16  | 1.32           | 3.07           | T1                    | 1.64            | 0.94  | 0.45           | 0.00           |
| 29ST               | 1                                                        | T0                    | 16.62           | 14.74 | 9.40           | 7.50           | T1                    | 4.56            | 2.81  | 2.33           | 2.45           |
| 36ST               | 1                                                        | T0                    | 5.51            | 3.44  | 2.33           | 4.38           | T1                    | 2.41            | 1.59  | 0.91           | 1.23           |
| 37ST               | 1                                                        | T0                    | 2.44            | 1.19  | 0.69           | 1.31           | T1                    | 2.81            | 1.27  | 0.69           | 1.30           |
| 40ST               | 1                                                        | T0                    | 8.63            | 8.72  | 5.52           | 1.27           | T1                    | 8.07            | 6.41  | 3.76           | 0.65           |
| 42ST               | 1                                                        | T0                    | 8.58            | 4.23  | 2.26           | 1.23           | T1                    | 2.73            | 1.64  | 0.69           | 0.00           |
| 43ST               | 1                                                        | T0                    | 17.67           | 14.55 | 9.29           | 3.73           | T1                    | 3.87            | 2.19  | 0.95           | 0.00           |
| 51MT               | 1                                                        | T0                    | 6.09            | 4.42  | 2.68           | 0.65           | T1                    | 2.75            | 1.75  | 0.77           | 1.94           |

|             |          |           |       |       |       |      |           |       |       |      |      |
|-------------|----------|-----------|-------|-------|-------|------|-----------|-------|-------|------|------|
| <b>52MT</b> | <i>l</i> | <i>T0</i> | 10.64 | 6.07  | 3.99  | 3.90 | <i>T1</i> | 10.92 | 10.76 | 5.44 | 2.58 |
| <b>54MT</b> | <i>l</i> | <i>T0</i> | 16.83 | 11.86 | 8.07  | 3.21 | <i>T1</i> | 12.97 | 9.53  | 6.53 | 1.92 |
| <b>56MT</b> | <i>l</i> | <i>T0</i> | 5.13  | 3.23  | 1.72  | 0.64 | <i>T1</i> | 7.26  | 5.42  | 3.50 | 2.55 |
| <b>60MT</b> | <i>l</i> | <i>T0</i> | 18.07 | 15.94 | 10.55 | 5.92 | <i>T1</i> | 9.66  | 6.43  | 3.91 | 2.60 |
| <b>61MT</b> | <i>l</i> | <i>T0</i> | 7.34  | 3.65  | 2.20  | 3.03 | <i>T1</i> | 8.23  | 3.34  | 1.64 | 0.66 |
| <b>62MT</b> | <i>l</i> | <i>T0</i> | 10.23 | 6.69  | 4.19  | 2.56 | <i>T1</i> | 11.62 | 7.59  | 4.60 | 3.95 |
| <b>66MT</b> | <i>l</i> | <i>T0</i> | 5.84  | 3.86  | 2.77  | 1.22 | <i>T1</i> | 10.81 | 8.19  | 5.33 | 1.94 |
| <b>68MT</b> | <i>l</i> | <i>T0</i> | 21.19 | 19.01 | 12.39 | 1.99 | <i>T1</i> | 9.01  | 6.66  | 4.05 | 1.90 |
| <b>71MT</b> | <i>l</i> | <i>T0</i> | 4.22  | 2.18  | 1.51  | 3.85 | <i>T1</i> | 8.58  | 4.56  | 2.77 | 2.44 |
| <b>73MT</b> | <i>l</i> | <i>T0</i> | 10.53 | 7.63  | 4.74  | 4.35 | <i>T1</i> | 11.19 | 10.03 | 5.85 | 7.45 |
| <b>76MT</b> | <i>l</i> | <i>T0</i> | 8.90  | 4.74  | 2.62  | 3.75 | <i>T1</i> | 12.86 | 7.82  | 4.25 | 4.91 |
| <b>79MT</b> | <i>l</i> | <i>T0</i> | 10.13 | 6.79  | 4.47  | 2.60 | <i>T1</i> | 4.73  | 2.67  | 1.85 | 1.30 |
| <b>80MT</b> | <i>l</i> | <i>T0</i> | 13.35 | 8.54  | 5.77  | 2.60 | <i>T1</i> | 10.58 | 8.08  | 4.74 | 4.38 |
