# Supplementary material for: Clinical and genomic safety of treatment with Ginkgo biloba L. leaf extract (IDN 5933/Ginkgoselect®Plus) in elderly: a randomised placebo-controlled clinical trial [GiBiEx]
Source: Springer Nature journal article supplement (doi:10.1186/s12906-018-2080-5), 2018-01-22
Supplement: MOESM4 [file 15406498]

**Additional file 4 Summary of the gene expression data carried out in the reported set of patients by real-time PCR analysis (as detailed in the Materials and Methods).**

Treatment ID: T, GBLE-treated; PL, placebo-treated

Patient ID: confidential patient identification

Raw Data: Ct average values (qRT-PCR exported data)

Fold change: relative gene expression evaluated at T1 compared to T0

Gene variation: DOWN, gene down-regulation at T1 compared to T0; UP, gene up-regulation at T1 compared to T0; =, non change in gene expression at T1 compared to T0

| Treatment ID | Patient ID | Raw Data |               | Fold change<br>( $\Delta\Delta$ Ct method) | Gene variation | Treatment ID | Patient ID | Raw Data |               | Fold change<br>( $\Delta\Delta$ Ct method) | Gene variation | Treatment ID | Patient ID | Raw Data |               | Fold change<br>( $\Delta\Delta$ Ct method) | Gene variation |      |
|--------------|------------|----------|---------------|--------------------------------------------|----------------|--------------|------------|----------|---------------|--------------------------------------------|----------------|--------------|------------|----------|---------------|--------------------------------------------|----------------|------|
|              |            | Ct GAPDH | Ct MYB        |                                            |                |              |            | Ct GAPDH | Ct P53        |                                            |                |              |            | Ct GAPDH | Ct CTNNB1     |                                            |                |      |
| T            | 11 RT0     | 29.24    | 34.73         | 1                                          | DOWN           | T            | 11 RT0     | 29.24    | 36.49         | 1                                          | =              | T            | 11 RT0     | 29.24    | not amplified |                                            |                |      |
|              | 11 RT1     | 28.11    | 35.3          | 0.31                                       |                | T            | 11 RT1     | 28.11    | 34.53         | 1.78                                       |                | T            | 11 RT1     | 28.11    | not amplified |                                            |                |      |
| T            | 29 ST0     | 30.81    | 36.55         | 1                                          | DOWN           | T            | 29 ST0     | 30.81    | 38.4          | 1                                          | UP             | T            | 29 ST0     | 30.81    | 40            | 1                                          | 0.043          | DOWN |
|              | 29 ST1     | 26.07    | 35.21         | 0.10                                       |                | T            | 29 ST1     | 26.07    | 32.19         | 2.77                                       |                | T            | 29 ST1     | 26.07    | 39.81         |                                            |                |      |
| T            | 40 ST0     | 26.93    | not amplified |                                            |                | T            | 40 ST0     | 26.93    | 36.27         | 1                                          | UP             | T            | 40 ST0     | 26.93    | not amplified |                                            |                |      |
|              | 40 ST1     | 30.15    | not amplified |                                            |                | T            | 40 ST1     | 30.15    | 34.88         | 24.42                                      |                | T            | 40 ST1     | 30.15    | not amplified |                                            |                |      |
| T            | 42 ST0     | 28.23    | 30.12         | 1                                          | =              | T            | 42 ST0     | 28.23    | 40            | 1                                          | UP             | T            | 42 ST0     | 28.23    | not amplified |                                            |                |      |
|              | 42 ST1     | 28.27    | 29.73         | 1.35                                       |                | T            | 42 ST1     | 28.27    | 34            | 65.80                                      |                | T            | 42 ST1     | 28.27    | not amplified |                                            |                |      |
| T            | 60 MT0     | 28.78    | 31.33         | 1                                          | UP             | T            | 60 MT0     | 28.78    | not amplified |                                            |                | T            | 60 MT0     | 28.78    | not amplified |                                            |                |      |
|              | 60 MT1     | 28.75    | 29.55         | 3.36                                       |                | T            | 60 MT1     | 28.75    | not amplified |                                            |                | T            | 60 MT1     | 28.75    | not amplified |                                            |                |      |
| T            | 66 MT0     | 30.58    | 34.66         | 1                                          | UP             | T            | 66 MT0     | 30.58    | 39.63         | 1                                          | UP             | T            | 66 MT0     | 30.58    | not amplified |                                            |                |      |
|              | 66 MT1     | 28.27    | 31.23         | 2.17                                       |                | T            | 66 MT1     | 28.27    | 36.02         | 2.46                                       |                | T            | 66 MT1     | 28.27    | not amplified |                                            |                |      |
| T            | 76 MT0     | 29.04    | 33.68         | 1                                          | UP             | T            | 76 MT0     | 29.04    | 36.13         | 1                                          | DOWN           | T            | 76 MT0     | 29.04    | not amplified |                                            |                |      |
|              | 76 MT1     | 26.83    | 29.06         | 5.31                                       |                | T            | 76 MT1     | 26.83    | 36.09         | 0.22                                       |                | T            | 76 MT1     | 26.83    | not amplified |                                            |                |      |
| T            | 62 MT0     | 31.97    | 33.15         | 1                                          | DOWN           | T            | 62 MT0     | 31.97    | 25.32         | 1                                          | DOWN           | T            | 62 MT0     | 31.97    | 32.11         | 1                                          |                | DOWN |
|              | 62 MT1     | 29.4     | 32.55         | 0.26                                       |                | T            | 62 MT1     | 29.4     | 25.52         | 0.15                                       |                | T            | 62 MT1     | 29.4     | 38.09         |                                            |                |      |
| PL           | 65 MT0     | 30.84    | 34.06         | 1                                          | UP             | PL           | 65 MT0     | 30.84    | 29.1          | 1                                          | UP             | PL           | 65 MT0     | 30.84    | not amplified |                                            |                |      |
|              | 65 MT1     | 31.7     | 32.94         | 3.94                                       |                | PL           | 65 MT1     | 31.7     | 24.85         | 34.54                                      |                | PL           | 65 MT1     | 31.7     | not amplified |                                            |                |      |
| PL           | 30 ST0     | 32.38    | 37.19         | 1                                          | DOWN           | PL           | 30 ST0     | 32.38    | 40            | 1                                          | UP             | PL           | 30 ST0     | 32.38    | 40            | 1                                          | 0.18           | UP   |
|              | 30 ST1     | 27.7     | 34.49         | 0.25                                       |                | PL           | 30 ST1     | 27.7     | 32.67         | 6.28                                       |                | PL           | 30 ST1     | 27.7     | 37.83         |                                            |                |      |
| PL           | 35 ST0     | 34.22    | 39.34         | 1                                          | DOWN           | PL           | 35 ST0     | 34.22    | 38.54         | 1                                          | =              | PL           | 35 ST0     | 34.22    | 40            | 1                                          |                | =    |
|              | 35 ST1     | 27.89    | 35.7          | 0.15                                       |                | PL           | 35 ST1     | 27.89    | 33.07         | 0.55                                       |                | PL           | 35 ST1     | 27.89    | 36.84         |                                            |                |      |
| PL           | 44 ST0     | 29.54    | 31.27         | 1                                          | DOWN           | PL           | 44 ST0     | 29.54    | 40            | 1                                          | =              | PL           | 44 ST0     | 29.54    | not amplified |                                            |                |      |
|              | 44 ST1     | 25.82    | 29.7          | 0.23                                       |                | PL           | 44 ST1     | 25.82    | 35.68         | 1.52                                       |                | PL           | 44 ST1     | 25.82    | not amplified |                                            |                |      |
| PL           | 53 MT0     | 29.86    | 30.5          | 1                                          | =              | PL           | 53 MT0     | 29.86    | 35.08         | 1                                          | DOWN           | PL           | 53 MT0     | 29.86    | not amplified |                                            |                |      |
|              | 53 MT1     | 26.53    | 27.52         | 0.78                                       |                | PL           | 53 MT1     | 26.53    | 35.08         | 0.10                                       |                | PL           | 53 MT1     | 26.53    | not amplified |                                            |                |      |
| PL           | 55 MT0     | 21.75    | 22.8          | 1                                          | =              | PL           | 55 MT0     | 21.75    | not amplified |                                            |                | PL           | 55 MT0     | 21.75    | 31.5          | 1                                          |                | DOWN |
|              | 55 MT1     | 29.1     | 29.21         | 1.92                                       |                | PL           | 55 MT1     | 29.1     | not amplified |                                            |                | PL           | 55 MT1     | 29.1     | 40            |                                            |                |      |
| PL           | 72 MT0     | 27.56    | 27.66         | 1                                          | =              | PL           | 72 MT0     | 27.56    | not amplified |                                            |                | PL           | 72 MT0     | 27.56    | not amplified |                                            |                |      |
|              | 72 MT1     | 32.46    | 32.37         | 1.14                                       |                | PL           | 72 MT1     | 32.46    | not amplified |                                            |                | PL           | 72 MT1     | 32.46    | not amplified |                                            |                |      |
| PL           | 74 MT0     | 26.64    | 27.91         | 1                                          | =              | PL           | 74 MT0     | 26.64    | not amplified |                                            |                | PL           | 74 MT0     | 26.64    | not amplified |                                            |                |      |
|              | 74 MT1     | 29.06    | 30.76         | 0.74                                       |                | PL           | 74 MT1     | 29.06    | not amplified |                                            |                | PL           | 74 MT1     | 29.06    | not amplified |                                            |                |      |
| PL           | 59 MT0     | 28.88    | 30.95         | 1                                          | DOWN           | PL           | 59 MT0     | 28.88    | 26.5          | 1                                          | =              | PL           | 59 MT0     | 28.88    | not amplified |                                            |                |      |
|              | 59 MT1     | 29.01    | 32.51         | 0.37                                       |                | PL           | 59 MT1     | 29.01    | 27.23         | 0.66                                       |                | PL           | 59 MT1     | 29.01    | not amplified |                                            |                |      |
