# Supplementary material for: Clinical and genomic safety of treatment with Ginkgo biloba L. leaf extract (IDN 5933/Ginkgoselect®Plus) in elderly: a randomised placebo-controlled clinical trial [GiBiEx]
Source: Springer Nature journal article supplement (doi:10.1186/s12906-018-2080-5), 2018-01-22
Supplement: MOESM5 [file 15406498]

**Additional file 5**

**Micronucleus Assay raw data**

**Individual data relative to MN Assay, before (T0) and after (T1) placebo or IDN 5933 administration.**

**Data MN T0**

|              |                            | T0           |    |              |    |              |    |              |    |              |    |              |    |              |    |              |    | Total BNC | Total MN | MN % |
|--------------|----------------------------|--------------|----|--------------|----|--------------|----|--------------|----|--------------|----|--------------|----|--------------|----|--------------|----|-----------|----------|------|
| Patient Code | Status_Treated_T_Placebo_P | Replicate A1 |    | Replicate B1 |    | Replicate A2 |    | Replicate B2 |    | Replicate A3 |    | Replicate B3 |    | Replicate A4 |    | Replicate B4 |    |           |          |      |
|              |                            | BNC          | MN | BNC          | MN | BNC          | MN | BNC          | MN | BNC          | MN | BNC          | MN | BNC          | MN | BNC          | MN |           |          |      |
| 1R           | T                          | 15           | 0  | 0            | 0  | 18           | 0  | 0            | 0  | 13           | 1  | 2            | 0  |              |    |              |    | 48        | 1        |      |
| 5R           | P                          | 21           | 1  | 21           | 0  | 14           | 0  | 195          | 1  | 6            | 0  | 32           | 0  |              |    |              |    | 289       | 2        | 6.92 |
| 10R          | T                          | 214          | 3  | 105          | 0  | 187          | 2  | 64           | 1  | 45           | 0  | 4            | 0  |              |    |              |    | 619       | 6        | 9.69 |
| 11R          | T                          | 100          | 2  | 61           | 1  | 78           | 1  | 39           | 1  | 3            | 0  | 31           | 0  |              |    |              |    | 312       | 5        | 16.0 |
| 13R          | T                          | 888          | 5  | 513          | 6  |              |    |              |    |              |    |              |    |              |    |              |    | 1401      | 11       | 7.85 |
| 14R          | T                          | 639          | 4  | 836          | 6  |              |    |              |    |              |    |              |    |              |    |              |    | 1475      | 10       | 6.78 |
| 51M          | T                          | 415          | 6  | 770          | 6  |              |    |              |    |              |    |              |    |              |    |              |    | 1185      | 12       | 10.1 |
| 52M          | T                          | 130          | 1  | 342          | 2  | 217          | 1  | 457          | 3  |              |    |              |    |              |    |              |    | 1146      | 7        | 6.11 |
| 53M          | P                          | 371          | 3  | 390          | 0  | 326          | 2  | 317          | 4  |              |    |              |    |              |    |              |    | 1404      | 9        | 6.41 |
| 54M          | T                          | 138          | 3  | 94           | 2  | 274          | 4  | 147          | 2  | 15           | 2  | 66           | 2  |              |    |              |    | 734       | 15       | 20.4 |
| 55M          | P                          | 203          | 0  | 286          | 1  | 214          | 2  | 267          | 4  | 161          | 1  | 97           | 0  |              |    |              |    | 1228      | 8        | 6.51 |
| 56M          | T                          | 4            | 0  | 213          | 1  | 150          | 1  | 309          | 3  | 32           | 0  | 117          | 1  |              |    |              |    | 825       | 6        | 7.27 |
| 59M          | P                          | 254          | 1  | 117          | 2  | 362          | 4  | 177          | 0  | 89           | 0  | 26           | 1  |              |    |              |    | 1025      | 8        | 7.80 |

|     |   |     |    |     |    |     |    |     |    |     |   |     |   |  |  |  |  |      |    |       |
|-----|---|-----|----|-----|----|-----|----|-----|----|-----|---|-----|---|--|--|--|--|------|----|-------|
| 60M | T | 249 | 1  | 282 | 1  | 231 | 2  | 301 | 2  |     |   |     |   |  |  |  |  | 1063 | 6  | 5.64  |
| 61M | T | 442 | 5  | 293 | 4  | 316 | 6  | 310 | 1  |     |   |     |   |  |  |  |  | 1361 | 16 | 11.76 |
| 62M | T | 606 | 3  | 618 | 0  |     |    |     |    |     |   |     |   |  |  |  |  | 1224 | 3  | 2.45  |
| 63M | P | 814 | 3  | 455 | 1  |     |    |     |    |     |   |     |   |  |  |  |  | 1269 | 4  | 3.15  |
| 65M | P | 262 | 5  | 229 | 2  | 41  | 0  | 247 | 7  | 163 | 0 | 29  | 0 |  |  |  |  | 971  | 14 | 14.42 |
| 66M | T | 175 | 3  | 307 | 0  | 188 | 1  | 189 | 1  | 9   | 0 | 194 | 0 |  |  |  |  | 1062 | 5  | 4.71  |
| 67M | P | 513 | 3  | 428 | 4  | 471 | 0  | 399 | 0  |     |   |     |   |  |  |  |  | 1811 | 7  | 3.87  |
| 68M | T | 0   | 0  | 184 | 1  | 203 | 4  | 267 | 5  | 10  | 0 |     |   |  |  |  |  | 664  | 10 | 15.06 |
| 70M | P | 421 | 2  | 357 | 5  | 419 | 0  | 443 | 1  |     |   |     |   |  |  |  |  | 1640 | 8  | 4.88  |
| 71M | T | 127 | 0  | 518 | 2  | 265 | 4  | 511 | 6  |     |   |     |   |  |  |  |  | 1421 | 12 | 8.44  |
| 72M | P | 135 | 4  | 576 | 14 | 181 | 2  | 462 | 4  |     |   |     |   |  |  |  |  | 1354 | 24 | 17.73 |
| 73M | T | 426 | 3  | 232 | 1  | 127 | 0  | 189 | 0  | 131 | 0 | 14  | 0 |  |  |  |  | 1119 | 4  | 3.57  |
| 74M | P | 210 | 4  | 265 | 5  | 216 | 5  | 684 | 6  |     |   |     |   |  |  |  |  | 1375 | 20 | 14.55 |
| 75M | P | 543 | 2  | 392 | 2  | 300 | 3  | 583 | 4  |     |   |     |   |  |  |  |  | 1818 | 11 | 6.05  |
| 76M | T | 361 | 2  | 373 | 5  | 472 | 1  | 617 | 4  |     |   |     |   |  |  |  |  | 1823 | 12 | 6.58  |
| 77M | P | 161 | 2  | 157 | 1  | 79  | 1  | 118 | 2  | 120 | 0 | 44  | 0 |  |  |  |  | 679  | 6  | 8.84  |
| 78M | P | 223 | 3  | 481 | 4  | 365 | 3  | 415 | 7  |     |   |     |   |  |  |  |  | 1484 | 17 | 11.46 |
| 79M | T | 79  | 1  | 516 | 6  | 351 | 8  | 354 | 10 |     |   |     |   |  |  |  |  | 1300 | 25 | 19.23 |
| 80M | T | 244 | 0  | 489 | 7  | 722 | 2  | 433 | 0  |     |   |     |   |  |  |  |  | 1888 | 9  | 4.77  |
| 25S | T | 557 | 11 | 209 | 3  | 627 | 11 | 349 | 1  |     |   |     |   |  |  |  |  | 1742 | 26 | 14.93 |
| 28S | T | 495 | 2  | 425 | 2  | 747 | 3  | 543 | 5  |     |   |     |   |  |  |  |  | 2210 | 12 | 5.43  |
| 29S | T | 458 | 5  | 714 | 11 |     |    |     |    |     |   |     |   |  |  |  |  | 1172 | 16 | 13.65 |
| 30S | P | 531 | 3  | 735 | 4  |     |    |     |    |     |   |     |   |  |  |  |  | 1266 | 7  | 5.53  |

|     |   |     |    |     |    |     |   |     |    |     |   |     |   |  |  |  |  |      |    |           |
|-----|---|-----|----|-----|----|-----|---|-----|----|-----|---|-----|---|--|--|--|--|------|----|-----------|
| 32S | P | 174 | 4  | 311 | 3  | 34  | 0 | 274 | 2  | 132 | 3 | 82  | 1 |  |  |  |  | 1007 | 13 | 12.9<br>1 |
| 33S | P | 465 | 4  | 238 | 3  | 391 | 1 | 281 | 0  |     |   |     |   |  |  |  |  | 1375 | 8  | 5.82      |
| 35S | P | 14  | 0  | 8   | 0  | 285 | 0 | 299 | 7  | 11  | 1 | 139 | 2 |  |  |  |  | 756  | 10 | 13.2<br>3 |
| 36S | T | 219 | 14 | 260 | 5  | 306 | 5 | 306 | 5  |     |   |     |   |  |  |  |  | 1091 | 29 | 26.5<br>8 |
| 37S | T | 259 | 1  | 716 | 7  | 293 | 0 | 584 | 4  |     |   |     |   |  |  |  |  | 1852 | 12 | 6.48      |
| 38S | P | 7   | 0  | 2   | 0  | 290 | 2 | 419 | 4  | 90  | 0 | 153 | 4 |  |  |  |  | 961  | 10 | 10.4<br>1 |
| 39S | P | 160 | 2  | 175 | 2  | 146 | 1 | 158 | 1  | 127 | 0 | 166 | 0 |  |  |  |  | 932  | 6  | 6.44      |
| 40S | T | 342 | 4  | 202 | 1  | 168 | 2 | 127 | 3  | 98  | 0 | 142 | 3 |  |  |  |  | 1079 | 13 | 12.0<br>5 |
| 42S | T | 290 | 3  | 477 | 5  | 266 | 1 | 399 | 4  |     |   |     |   |  |  |  |  | 1432 | 13 | 9.08      |
| 43S | T | 243 | 4  | 124 | 2  | 85  | 2 | 70  | 0  | 60  | 1 | 92  | 0 |  |  |  |  | 674  | 9  | 13.3<br>5 |
| 44S | P | 389 | 5  | 581 | 14 | 401 | 6 | 530 | 15 |     |   |     |   |  |  |  |  | 1901 | 40 | 21.0<br>4 |

Data MN\_T1

|              |                                | T1           |    |              |    |              |    |              |    |              |    |              |    |              |    |              |    |           |          |              |
|--------------|--------------------------------|--------------|----|--------------|----|--------------|----|--------------|----|--------------|----|--------------|----|--------------|----|--------------|----|-----------|----------|--------------|
|              |                                | Replicate A1 |    | Replicate B1 |    | Replicate A2 |    | Replicate B2 |    | Replicate A3 |    | Replicate B3 |    | Replicate A4 |    | Replicate B4 |    | Total BNC | Total MN | MN%          |
| Patient Code | Status_Treated_T_Plac<br>ebo_P | BNC          | MN | BNC          | MN | BNC          | MN | BNC          | MN | BNC          | MN | BNC          | MN | BNC          | MN | BNC          | MN |           |          |              |
| 1R           | T                              | 718          | 3  | 139<br>3     | 40 |              |    |              |    |              |    |              |    |              |    |              |    | 2111      | 43       | 20,369<br>49 |
| 5R           | P                              | 486          | 8  | 580          | 11 |              |    |              |    |              |    |              |    |              |    |              |    | 1066      | 19       | 17,823<br>64 |
| 10R          | T                              | 424          | 6  | 589          | 9  |              |    |              |    |              |    |              |    |              |    |              |    | 1013      | 15       | 14,807<br>5  |
| 11R          | T                              | 774          | 16 | 862          | 11 |              |    |              |    |              |    |              |    |              |    |              |    | 1636      | 27       | 16,503<br>67 |
| 13R          | T                              | 614          | 13 | 844          | 13 |              |    |              |    |              |    |              |    |              |    |              |    | 1458      | 26       | 17,832<br>65 |
| 14R          | T                              | 492          | 1  | 453          | 1  | 357          | 1  | 388          | 1  |              |    |              |    |              |    |              |    | 1690      | 4        | 2,3668<br>64 |
| 51M          | T                              | 348          | 3  | 285          | 1  | 269          | 4  | 149          | 0  |              |    |              |    |              |    |              |    | 1051      | 8        | 7,6117<br>98 |
| 52M          | T                              | 294          | 2  | 252          | 2  | 40           | 0  | 154          | 0  | 1            | 1  | 102          | 1  |              |    |              |    | 843       | 6        | 7,1174<br>38 |
| 53M          | P                              | 632          | 5  | 545          | 4  |              |    |              |    |              |    |              |    |              |    |              |    | 1177      | 9        | 7,6465<br>59 |
| 54M          | T                              | 260          | 5  | 311          | 6  | 221          | 7  | 274          | 5  |              |    |              |    |              |    |              |    | 1066      | 23       | 21,575<br>98 |
| 55M          | P                              | 547          | 4  | 0            | 0  | 649          | 10 | 0            | 0  |              |    |              |    |              |    |              |    | 1196      | 14       | 11,705<br>69 |
| 56M          | T                              | 229          | 1  | 290          | 1  | 195          | 0  | 195          | 0  | 323          | 1  | 385          | 1  |              |    |              |    | 1617      | 4        | 2,4737<br>17 |
| 59M          | P                              | 0            | 0  | 931          | 4  | 926          | 14 | 911          | 8  |              |    |              |    |              |    |              |    | 2768      | 26       | 9,3930       |

|     |   |     |    |     |    |     |   |     |   |     |   |     |   |  |  |  |  |  |      |    |              |
|-----|---|-----|----|-----|----|-----|---|-----|---|-----|---|-----|---|--|--|--|--|--|------|----|--------------|
|     |   |     |    |     |    |     |   |     |   |     |   |     |   |  |  |  |  |  |      | 64 |              |
| 60M | T | 531 | 11 | 515 | 13 |     |   |     |   |     |   |     |   |  |  |  |  |  | 1046 | 24 | 22,944<br>55 |
| 61M | T | 326 | 4  | 318 | 5  | 281 | 2 | 475 | 2 |     |   |     |   |  |  |  |  |  | 1400 | 13 | 9,2857<br>14 |
| 62M | T | 347 | 2  | 419 | 2  | 364 | 2 | 355 | 0 |     |   |     |   |  |  |  |  |  | 1485 | 6  | 4,0404<br>04 |
| 63M | P | 530 | 8  | 512 | 10 |     |   |     |   |     |   |     |   |  |  |  |  |  | 1042 | 18 | 17,274<br>47 |
| 65M | P | 237 | 4  | 186 | 9  | 194 | 3 | 232 | 6 | 3   | 0 | 91  | 0 |  |  |  |  |  | 943  | 22 | 23,329<br>8  |
| 66M | T | 132 | 1  | 74  | 0  | 129 | 0 | 129 | 1 | 113 | 2 | 331 | 0 |  |  |  |  |  | 908  | 4  | 4,4052<br>86 |
| 67M | P | 389 | 3  | 129 | 1  | 201 | 1 | 219 | 2 | 608 | 3 | 334 | 3 |  |  |  |  |  | 1880 | 13 | 6,9148<br>94 |
| 68M | T | 357 | 8  | 321 | 5  | 246 | 6 | 263 | 6 |     |   |     |   |  |  |  |  |  | 1187 | 25 | 21,061<br>5  |
| 70M | P | 155 | 1  | 216 | 2  | 160 | 0 | 322 | 3 | 135 | 1 | 42  | 0 |  |  |  |  |  | 1030 | 7  | 6,7961<br>17 |
| 71M | T | 515 | 9  | 758 | 8  |     |   |     |   |     |   |     |   |  |  |  |  |  | 1273 | 17 | 13,354<br>28 |
| 72M | P | 990 | 5  | 165 | 3  |     |   |     |   |     |   |     |   |  |  |  |  |  | 1155 | 8  | 6,9264<br>07 |
| 73M | T | 254 | 6  | 247 | 2  | 395 | 7 | 260 | 3 |     |   |     |   |  |  |  |  |  | 1156 | 18 | 15,570<br>93 |
| 74M | P | 673 | 18 | 583 | 15 |     |   |     |   |     |   |     |   |  |  |  |  |  | 1256 | 33 | 26,273<br>89 |
| 75M | P | 477 | 1  | 449 | 6  | 573 | 2 | 629 | 6 |     |   |     |   |  |  |  |  |  | 2128 | 15 | 7,0488<br>72 |
| 76M | T | 591 | 4  | 953 | 12 |     |   |     |   |     |   |     |   |  |  |  |  |  | 1544 | 16 | 10,362<br>69 |
| 77M | P | 38  | 0  | 187 | 5  | 349 | 5 | 345 | 3 | 10  | 0 | 1   | 0 |  |  |  |  |  | 930  | 13 | 13,978<br>49 |
| 78M | P | 713 | 13 | 467 | 12 |     |   |     |   |     |   |     |   |  |  |  |  |  | 1180 | 25 | 21,186       |

|     |   |     |   |     |    |     |   |     |   |    |   |     |    |  |  |     |   |      |    |              |
|-----|---|-----|---|-----|----|-----|---|-----|---|----|---|-----|----|--|--|-----|---|------|----|--------------|
|     |   |     |   |     |    |     |   |     |   |    |   |     |    |  |  |     |   |      |    | 44           |
| 79M | T | 171 | 4 | 797 | 11 | 540 | 9 | 613 | 8 |    |   |     |    |  |  |     |   | 2121 | 32 | 15,087<br>22 |
| 80M | T | 53  | 0 | 56  | 0  | 13  | 0 | 39  | 0 | 15 | 1 | 73  | 0  |  |  |     |   | 249  | 1  | 4,0160<br>64 |
| 25S | T | 278 | 1 | 776 | 9  |     |   |     |   |    |   |     |    |  |  |     |   | 1054 | 10 | 9,4876<br>66 |
| 28S | T | 255 | 2 | 650 | 10 | 88  | 0 | 699 | 1 |    |   |     |    |  |  |     |   | 1692 | 13 | 7,6832<br>15 |
| 29S | T | 299 | 3 | 692 | 6  |     |   |     |   |    |   |     |    |  |  |     |   | 991  | 9  | 9,0817<br>36 |
| 30S | P | 516 | 0 | 633 | 3  |     |   |     |   |    |   |     |    |  |  |     |   | 1149 | 3  | 2,6109<br>66 |
| 32S | P | 462 | 3 | 307 | 5  | 396 | 0 | 338 | 2 |    |   |     |    |  |  |     |   | 1503 | 10 | 6,6533<br>6  |
| 33S | P | 329 | 1 | 769 | 2  |     |   |     |   |    |   |     |    |  |  |     |   | 1098 | 3  | 2,7322<br>4  |
| 35S | P | 598 | 9 | 634 | 10 |     |   |     |   |    |   |     |    |  |  |     |   | 1232 | 19 | 15,422<br>08 |
| 36S | T | 201 | 3 | 433 | 9  | 85  | 0 | 364 | 3 |    |   |     |    |  |  |     |   | 1083 | 15 | 13,850<br>42 |
| 37S | T | 283 | 6 | 722 | 13 |     |   |     |   |    |   |     |    |  |  |     |   | 1005 | 19 | 18,905<br>47 |
| 38S | P | 105 | 4 | 5   | 0  | 83  | 0 | 51  | 0 | 85 | 0 | 15  | 1  |  |  |     |   | 344  | 5  | 14,534<br>88 |
| 39S | P | 298 | 5 | 485 | 6  | 319 | 3 | 241 | 2 |    |   |     |    |  |  |     |   | 1343 | 16 | 11,913<br>63 |
| 40S | T | 135 | 2 | 372 | 7  | 69  | 0 | 364 | 4 | 12 | 0 | 82  | 0  |  |  |     |   | 1034 | 13 | 12,572<br>53 |
| 42S | T | 271 | 2 | 136 | 2  | 110 | 1 | 312 | 1 | 36 | 0 | 420 | 12 |  |  |     |   | 1285 | 18 | 14,007<br>78 |
| 43S | T | 66  | 1 | 22  | 0  | 92  | 1 | 73  | 0 | 1  | 0 | 217 | 1  |  |  |     |   | 471  | 3  | 6,3694<br>27 |
| 44S | P | 33  | 1 | 35  | 0  | 26  | 0 | 37  | 0 | 32 | 1 |     |    |  |  | 168 | 0 | 331  | 2  | 6,0422       |
