# Supplementary material for: Clinical and genomic safety of treatment with Ginkgo biloba L. leaf extract (IDN 5933/Ginkgoselect®Plus) in elderly: a randomised placebo-controlled clinical trial [GiBiEx]
Source: BMC Complement Altern Med. 2018 Jan 22;18:22. doi: 10.1186/s12906-018-2080-5 (PMC5778811; doi:10.1186/s12906-018-2080-5)
Supplement: Supplementary file 2 — Questionnaire. GiBiEx QUESTIONNAIRE. The English version of the questionnaire administered to all participants to the GiBiEx study is reported. (PDF 10 kb) [file 12906_2018_2080_MOESM2_ESM.pdf]

Date Questionnaire \_\_\_\_/\_\_\_\_/\_\_\_\_

Participant's ID Number.....

## STUDY GiBiEx QUESTIONNAIRE

*Please answer the following questions concerning your personal informations and present health status*

| PARTICIPANT'S INFORMATION |                             |          |
|---------------------------|-----------------------------|----------|
| Nursing Home .....        |                             |          |
| Date Admission.....       | Marital Status .....        |          |
| Ethnicity.....            | Education (years).....      |          |
| Weight (current).....Kg   |                             |          |
| Height ..... m            |                             |          |
| Sex M F                   | Date of Birth____/____/____ | Age..... |

| SMOKING HABITS                              |                   |                    |               |
|---------------------------------------------|-------------------|--------------------|---------------|
| Have you ever smoked ?                      | NO                | Yes                | EX-Smoker     |
| If Ex Smoker, How long have you not smoked? | (from 1-6 months) | (from 7-12 months) | (more 1 year) |

Date Questionnaire \_\_\_\_/\_\_\_\_/\_\_\_\_

Participant's ID Number.....

| <b>MEDICAL HISTORY</b><br><i>(You can make more than one choice and indicate your disease)</i> |
|------------------------------------------------------------------------------------------------|
| CARDIOVASCULAR DISEASES:                                                                       |
| PATHOLOGIES OF THE BLOOD AND LYMPHATIC SYSTEM:                                                 |
| RESPIRATORY DISEASES:                                                                          |
| GASTROINTESTINAL DISEASES:                                                                     |
| HEPATIC DISEASES:                                                                              |
| DISEASES OF THE GENITOURINARY SYSTEM:                                                          |
| ENDOCRINE, NUTRITIONAL AND METABOLIC DISEASES:                                                 |
| DISEASES OF THE MUSCULOSKELETAL SYSTEM                                                         |
| PSYCHIATRIC DISORDERS:                                                                         |
| NEUROLOGICAL DISEASES:                                                                         |
| <i>Other:</i>                                                                                  |

Date Questionnaire \_\_\_\_/\_\_\_\_/\_\_\_\_

Participant's ID Number.....

---

| DRUG THERAPY |              |                                     |                             |
|--------------|--------------|-------------------------------------|-----------------------------|
| DRUG<br>N.   | DRUG<br>NAME | FREQUENCY OF DRUG<br>ADMINISTRATION | PRESCRIPTION DRUG<br>DOSAGE |
| 1            |              |                                     |                             |
| 2            |              |                                     |                             |
| 3            |              |                                     |                             |
| 4            |              |                                     |                             |
| 5            |              |                                     |                             |
| 6            |              |                                     |                             |
| 7            |              |                                     |                             |
| 8            |              |                                     |                             |
| 9            |              |                                     |                             |
| 10           |              |                                     |                             |
